# Supplementary material
Source: PubMed Central journal article supplement (PMC8487022)
Supplement: mmc1.pdf [file mmc1.pdf]

**Supplemental information**

**5-Hydroxymethyltubercidin exhibits potent  
antiviral activity against flaviviruses  
and coronaviruses, including SARS-CoV-2**

**Kentaro Uemura, Haruaki Nobori, Akihiko Sato, Takao Sanaki, Shinsuke Toba, Michihito Sasaki, Akiho Murai, Noriko Saito-Tarashima, Noriaki Minakawa, Yasuko Orba, Hiroaki Kariwa, William W. Hall, Hirofumi Sawa, Akira Matsuda, and Katsumi Maenaka**

1 **Figure S1. Synthesis and characterization of HMTU-TP, Related to STAR Methods**

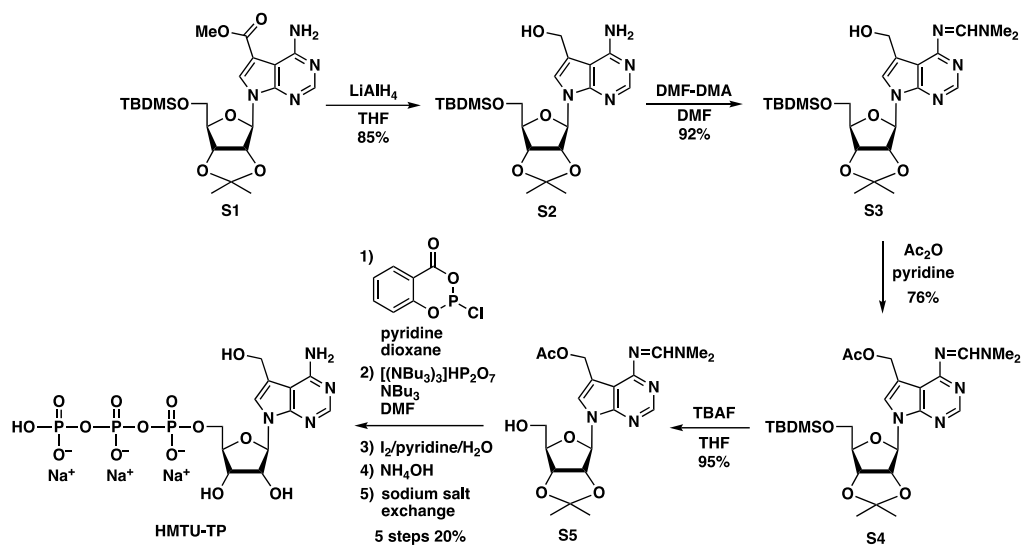

2

3

4 **Data S1. List of NMR spectra, Related to STAR Methods**

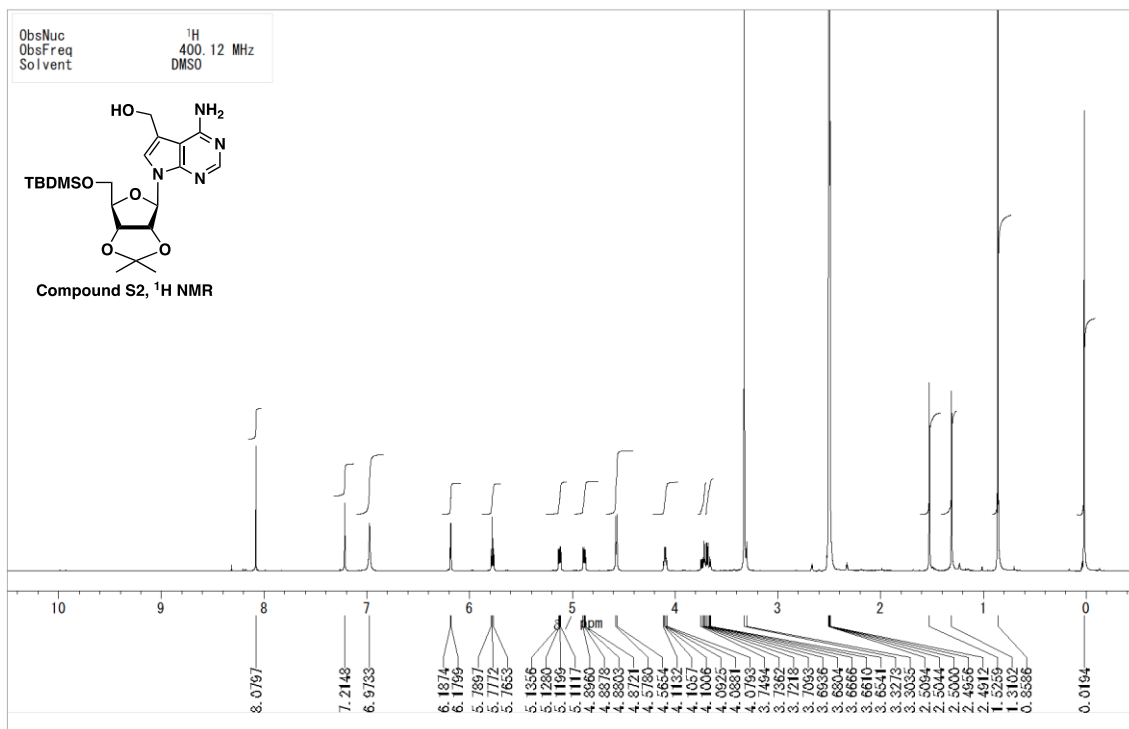

5

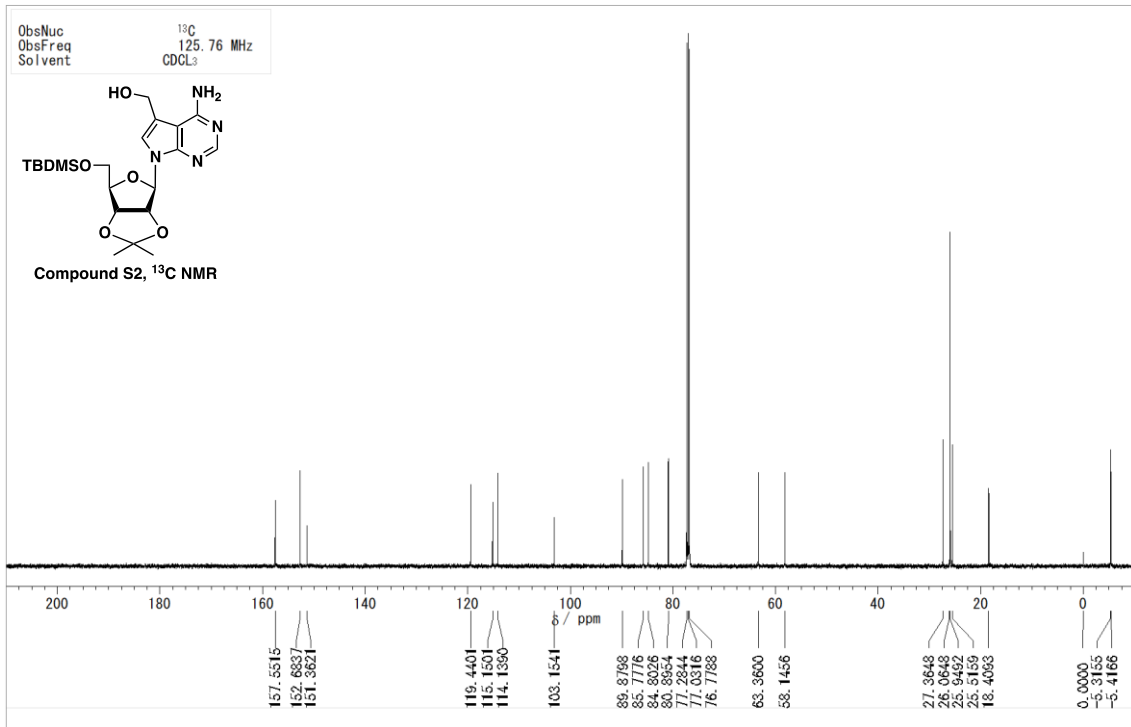

6

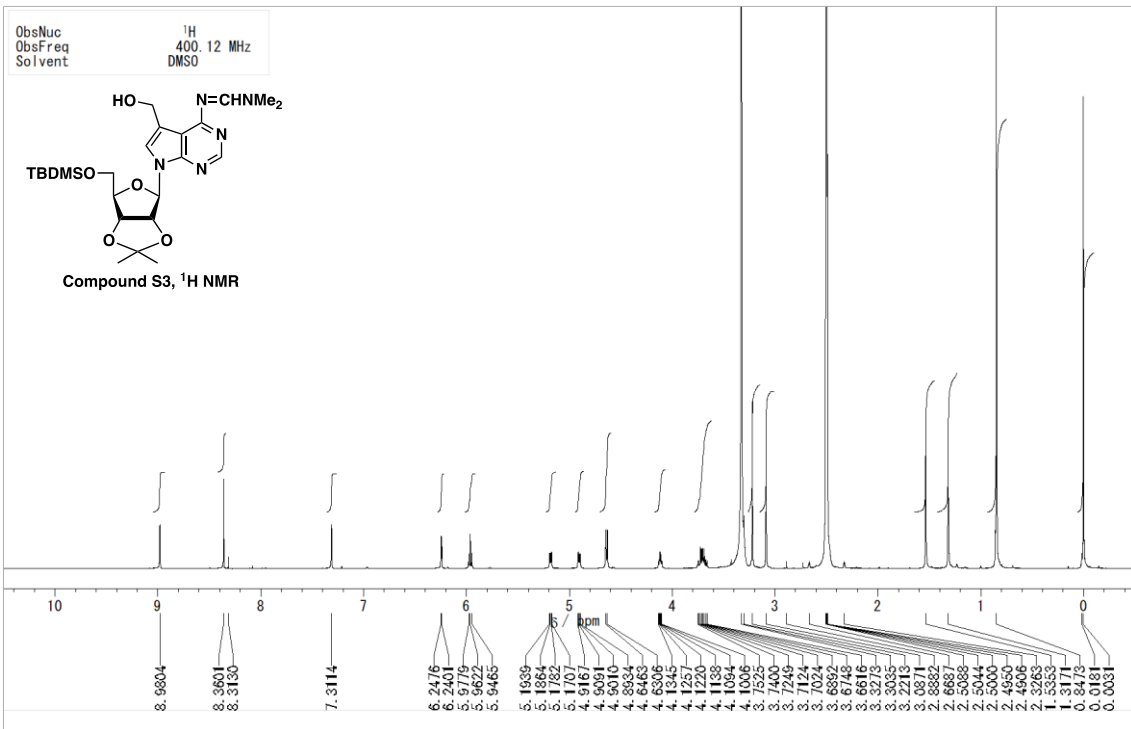

7

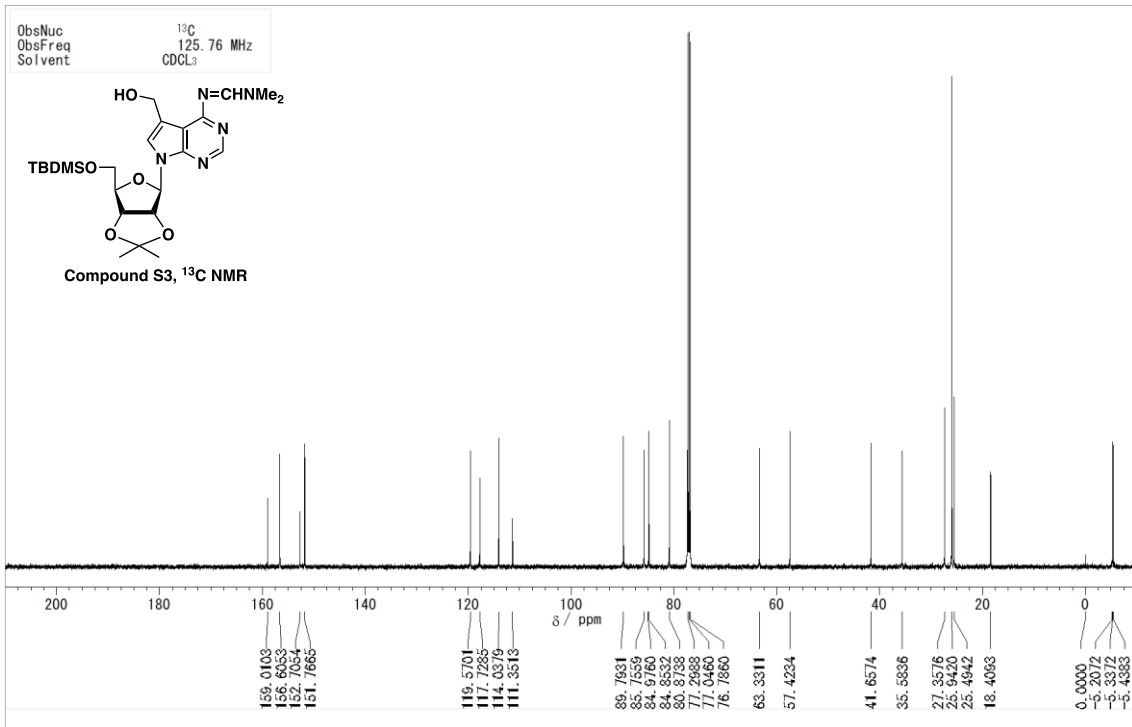

8

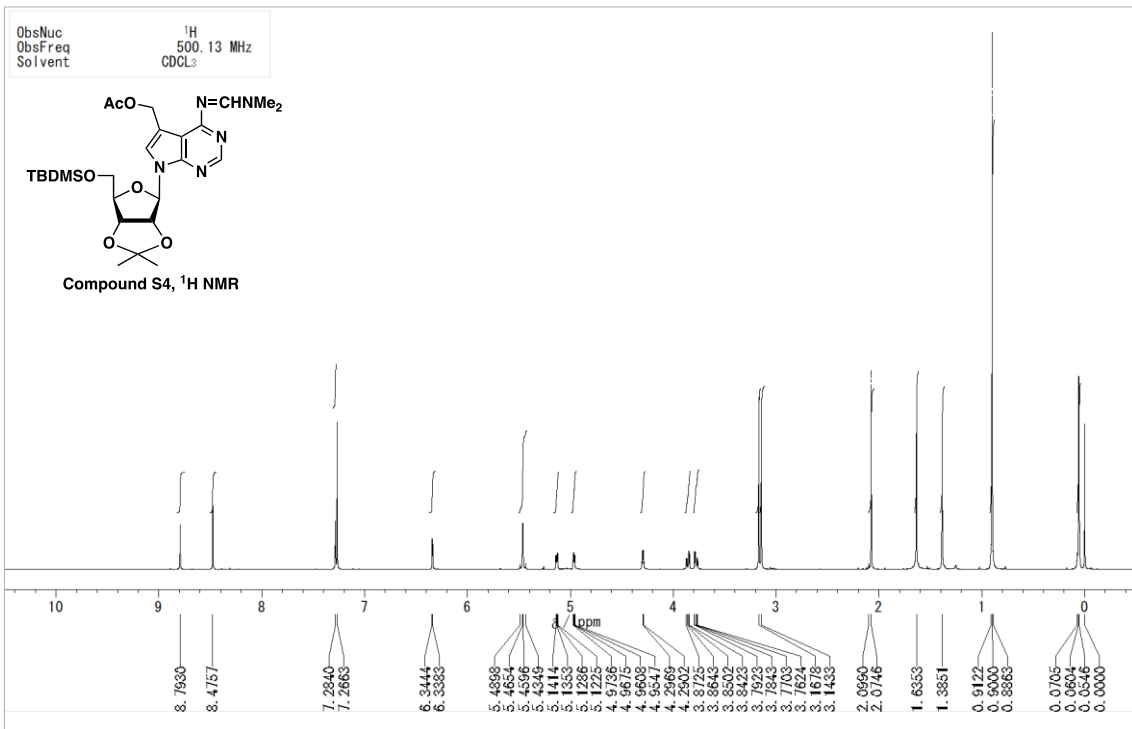

9

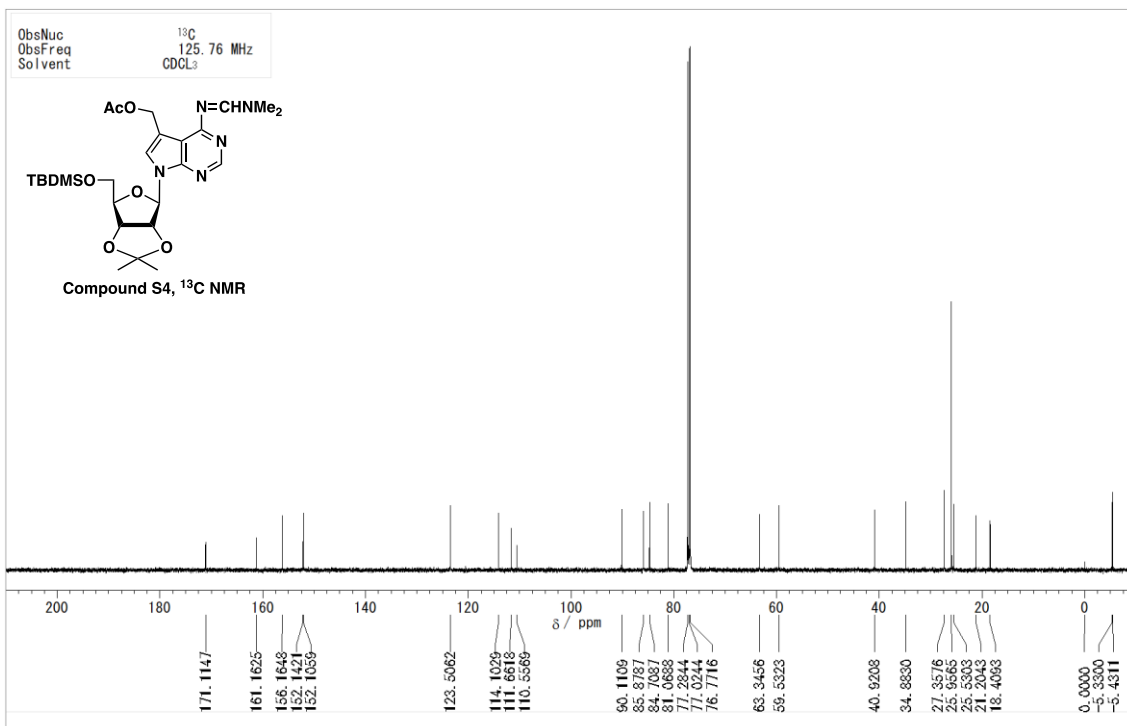

10

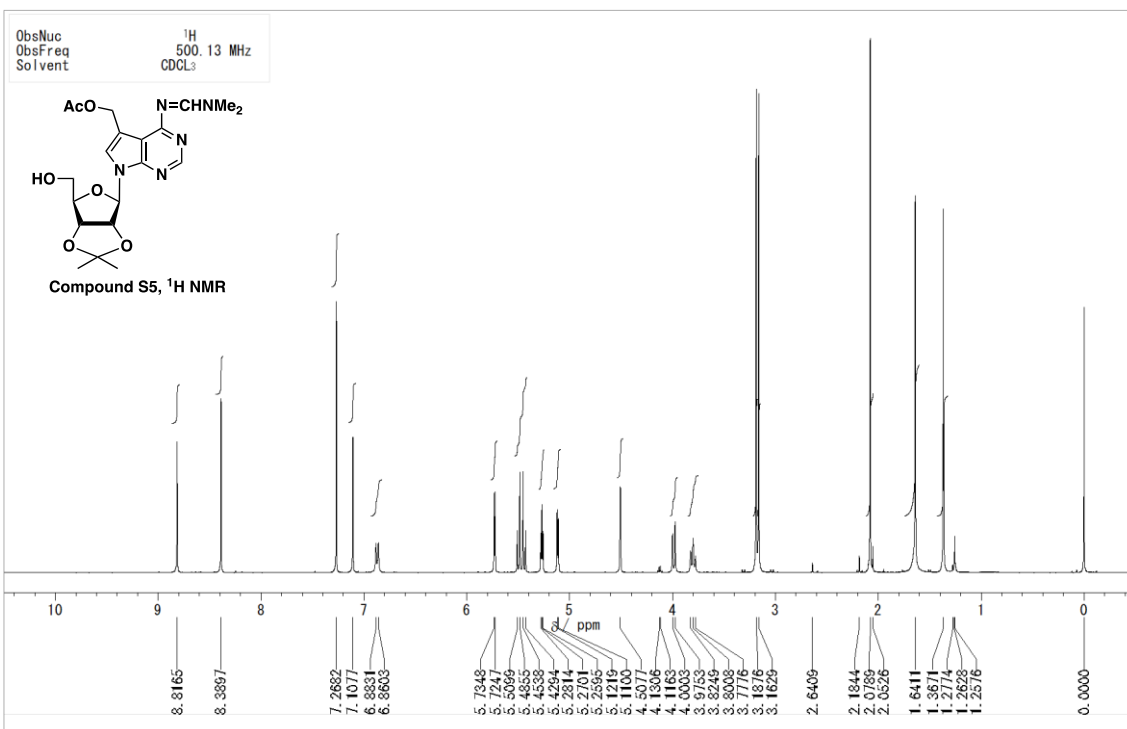

11

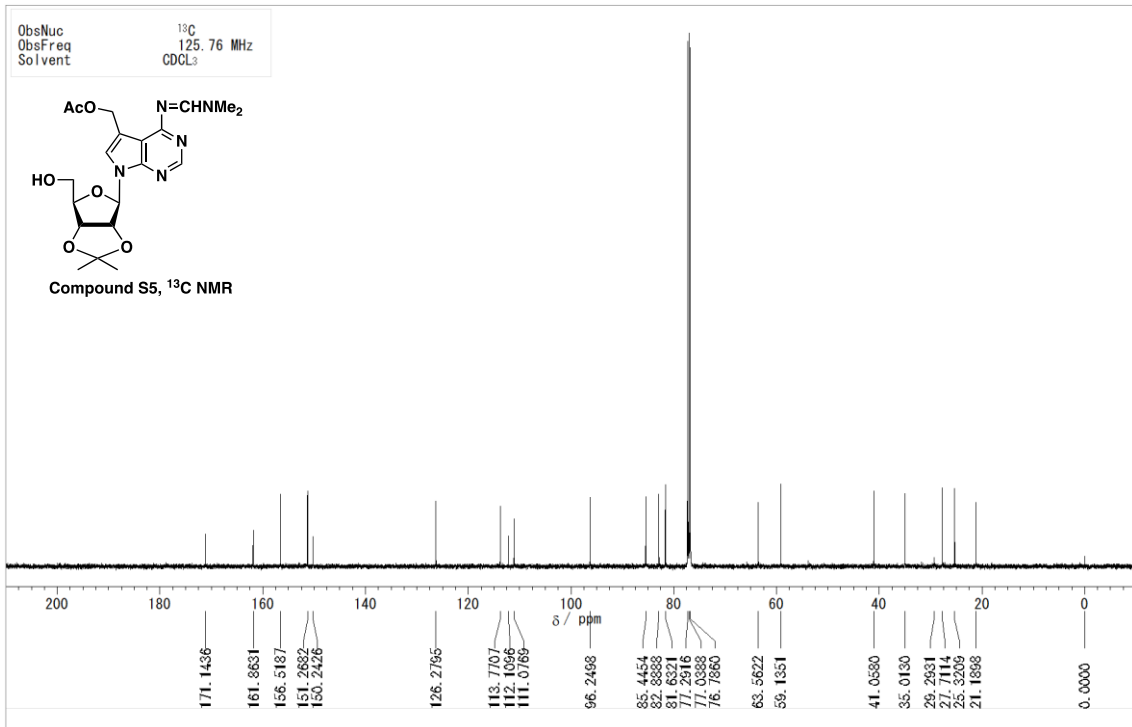

12

13

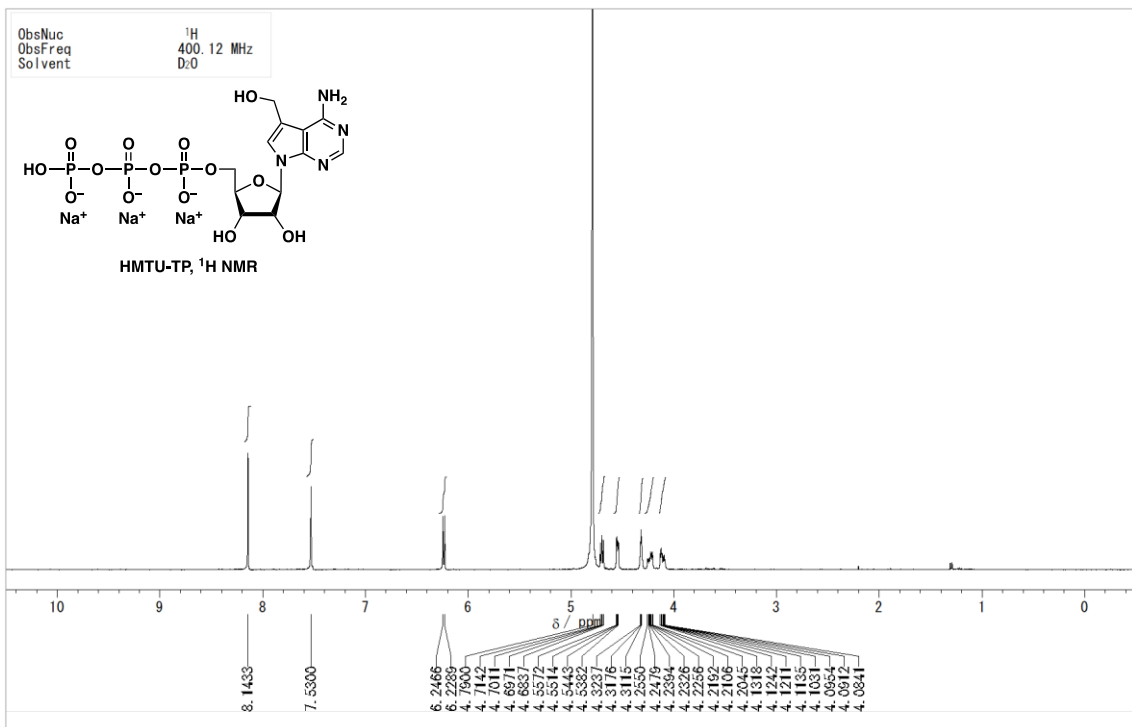

14

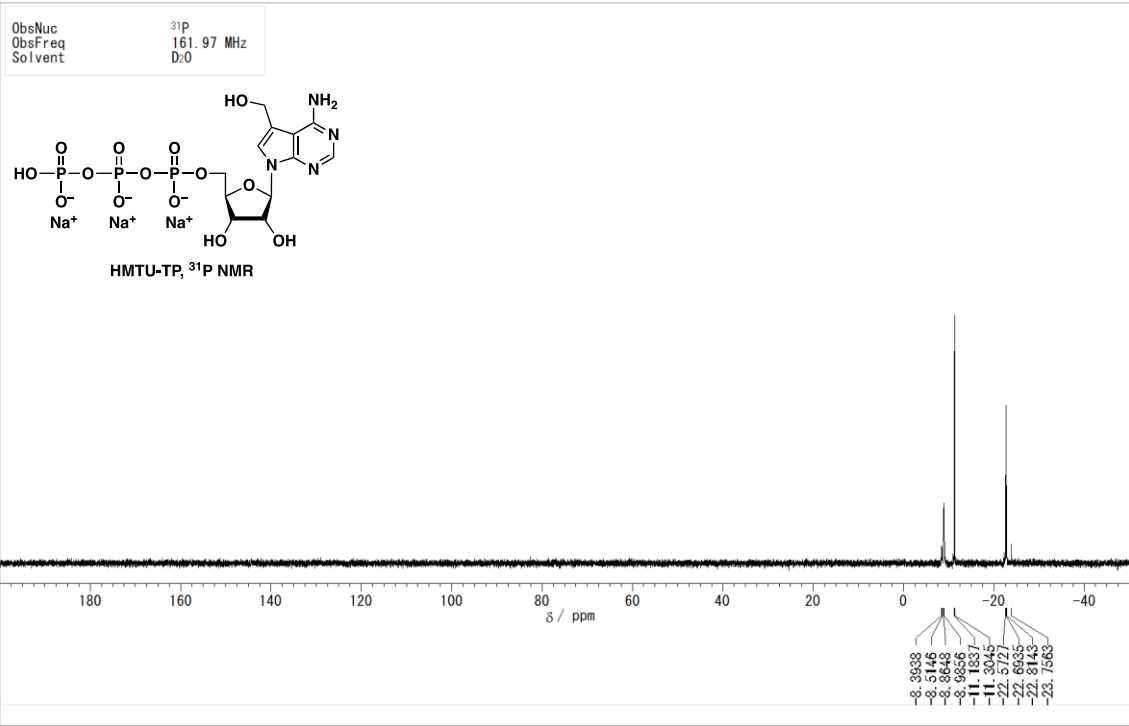

15

16
